# Supplementary material for: Altered brain protein expression profiles are associated with molecular neurological dysfunction in the PKU mouse model
Source: PubMed Central journal article supplement — J Neurochem. 2014 Mar 24;129(6):1002–12. doi: 10.1111/jnc.12683 (PMC4286000; doi:10.1111/jnc.12683), 2014-03-24

**Figure 1S.** Protein identification by tandem mass spectrometry. MS full scan, MS/MS scan and amino acid sequence of (A) Dpysl2, (B) Nsf, (C) Dpysl3 and (D) Sept11. Each MS/MS spectrum shows the predicted peptide sequence and the identified tryptic fragment.

# Figure 1S A

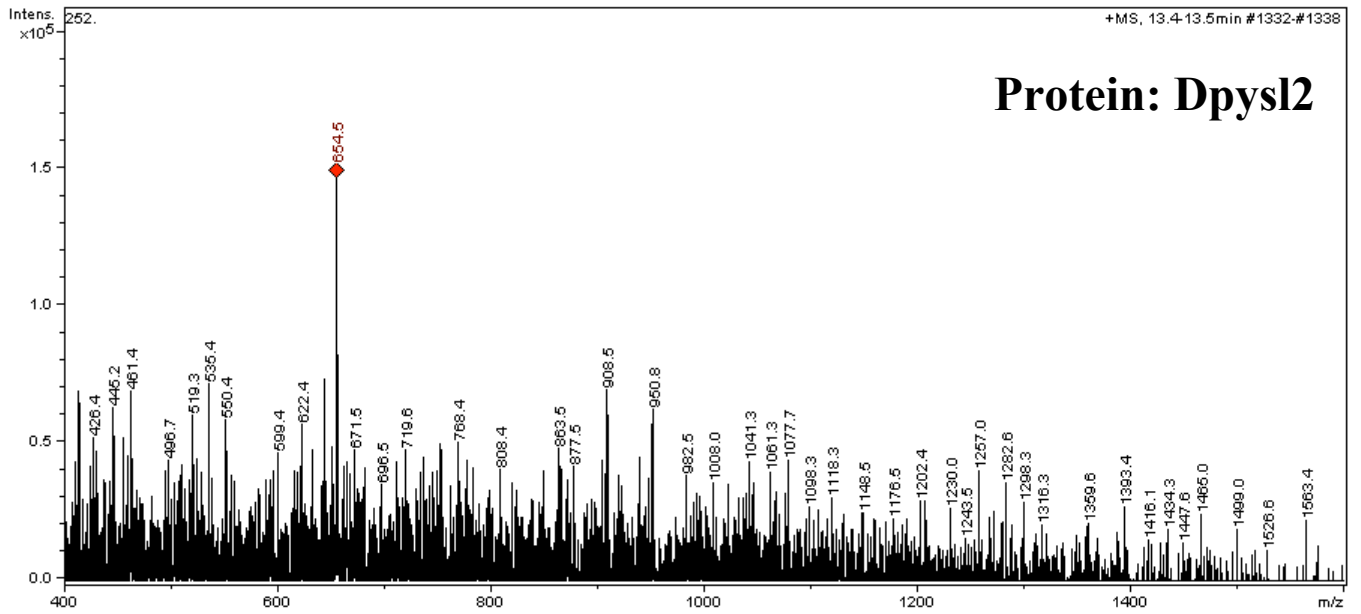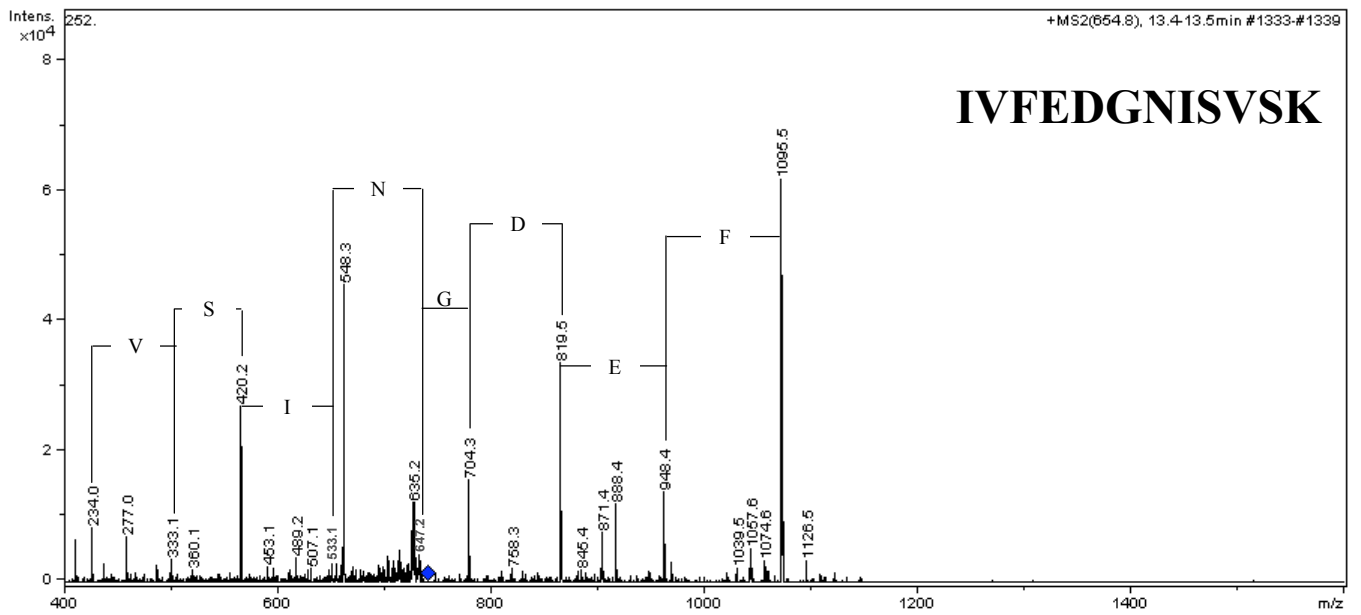

# Figure 1S B

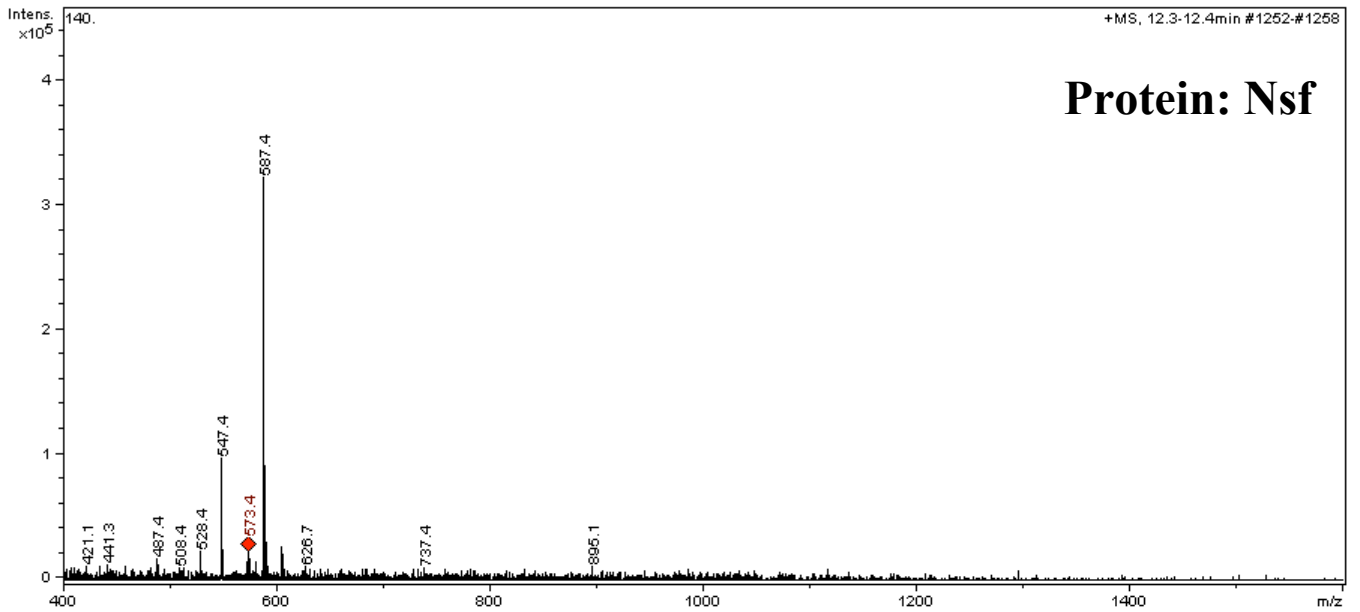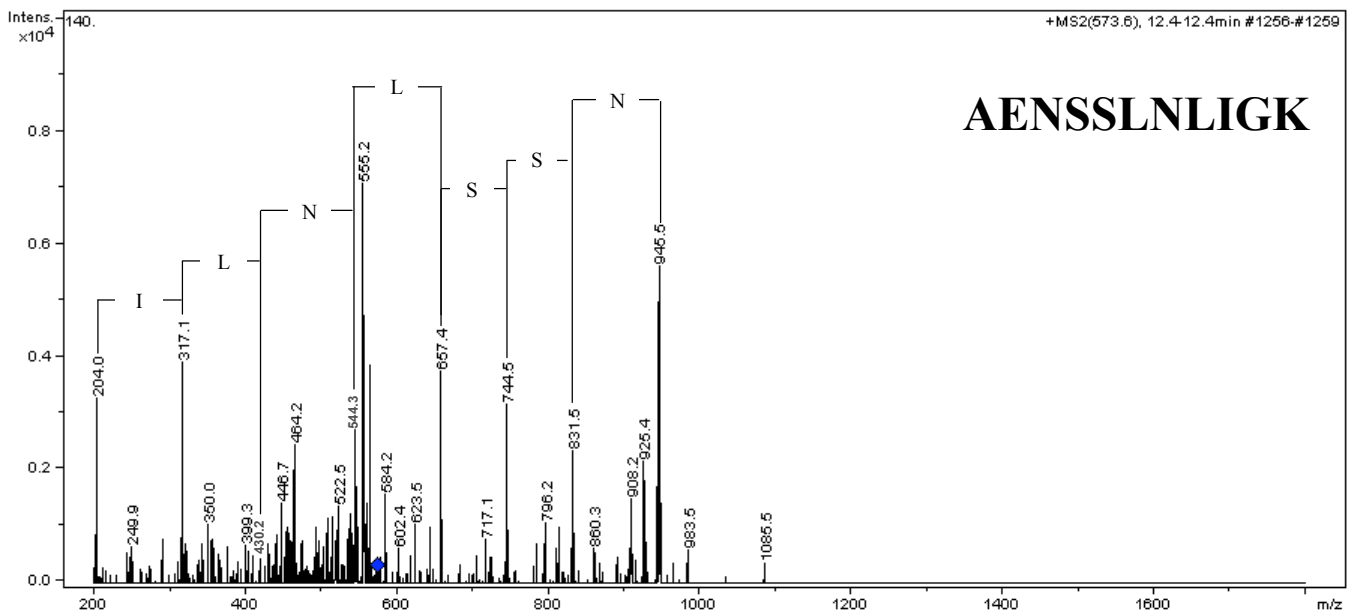

# Figure 1S C

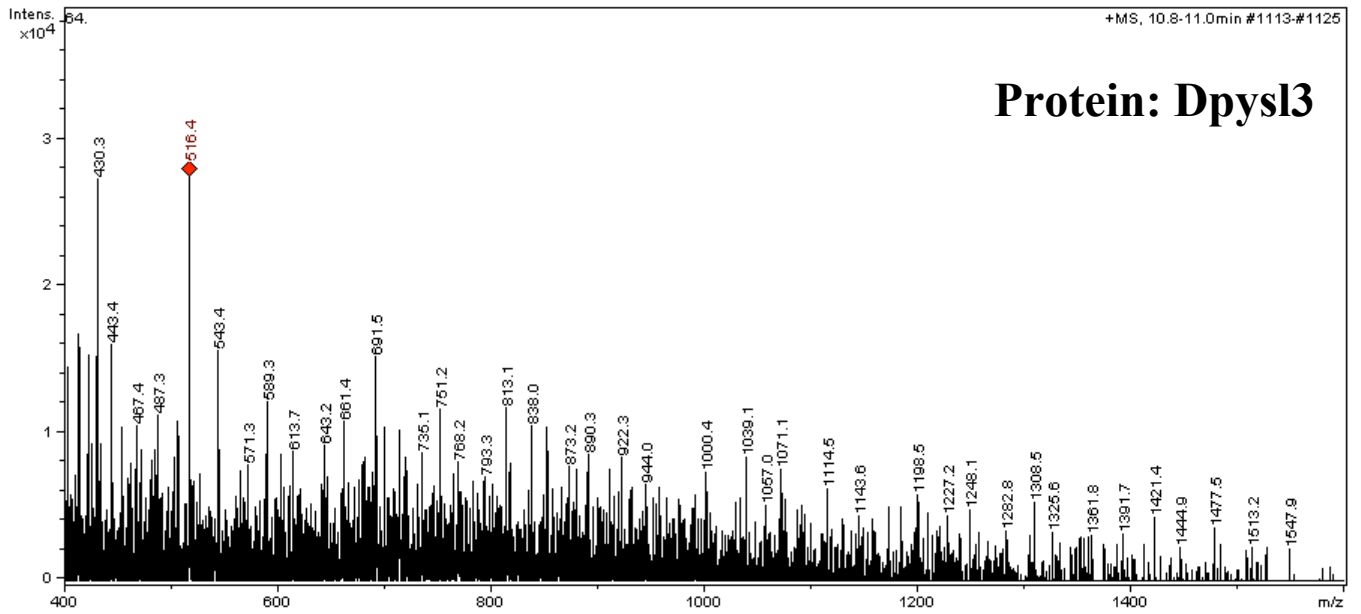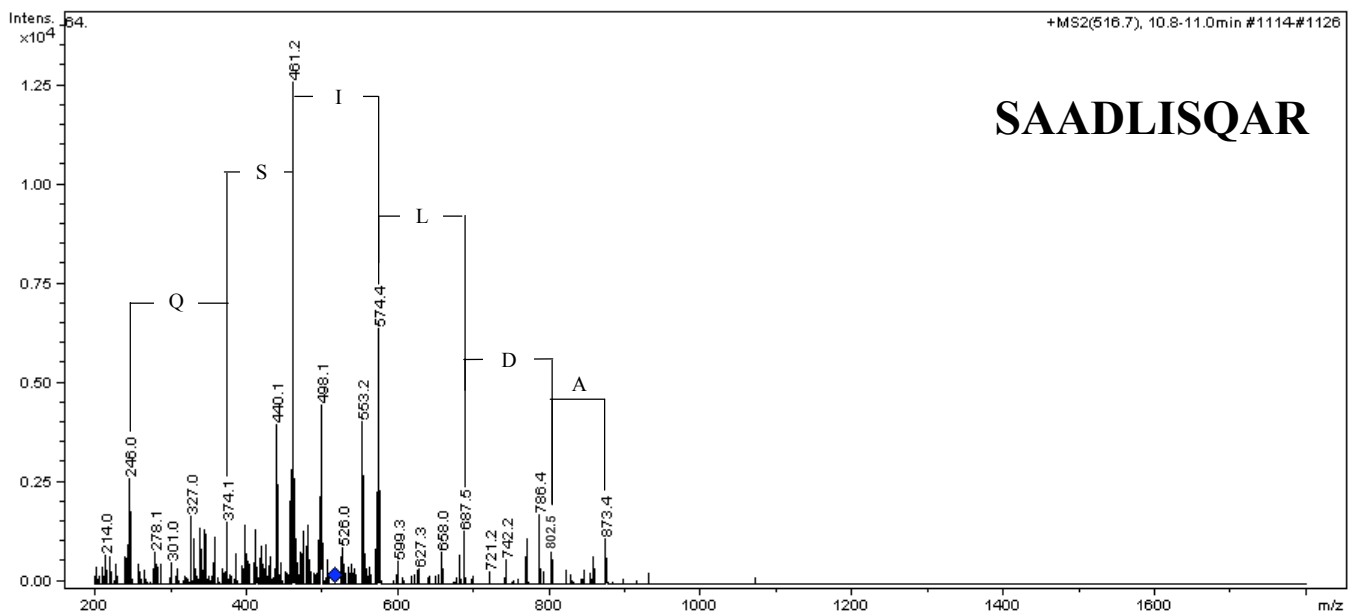

# Figure 1S D

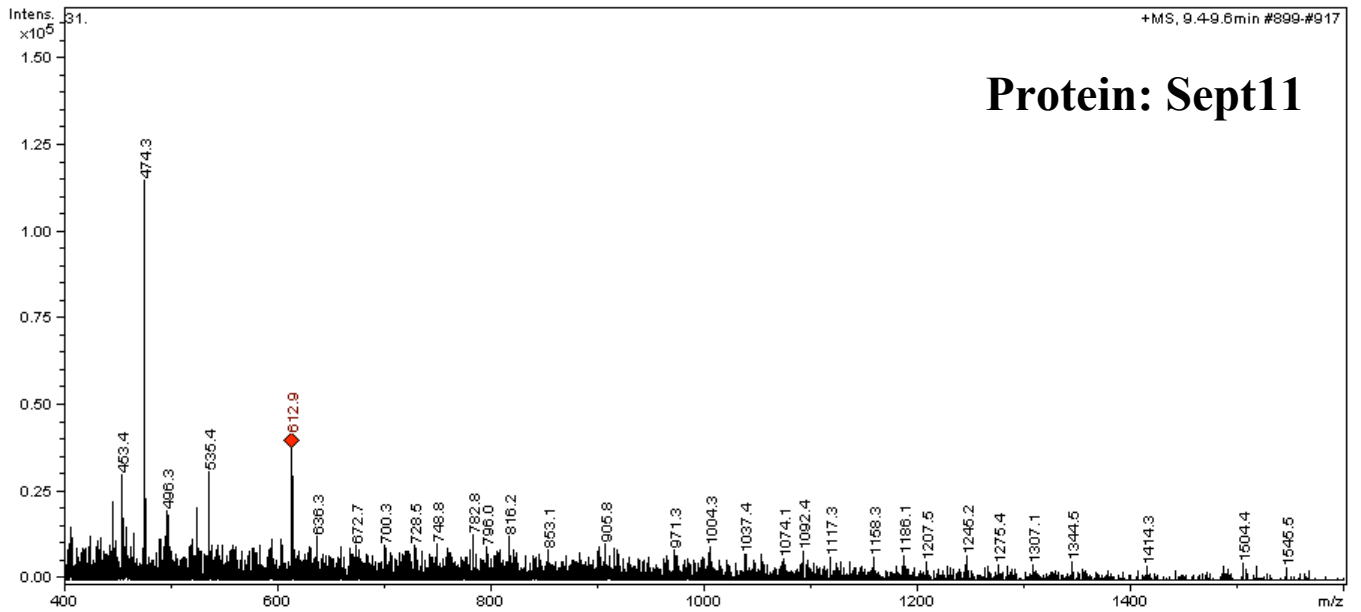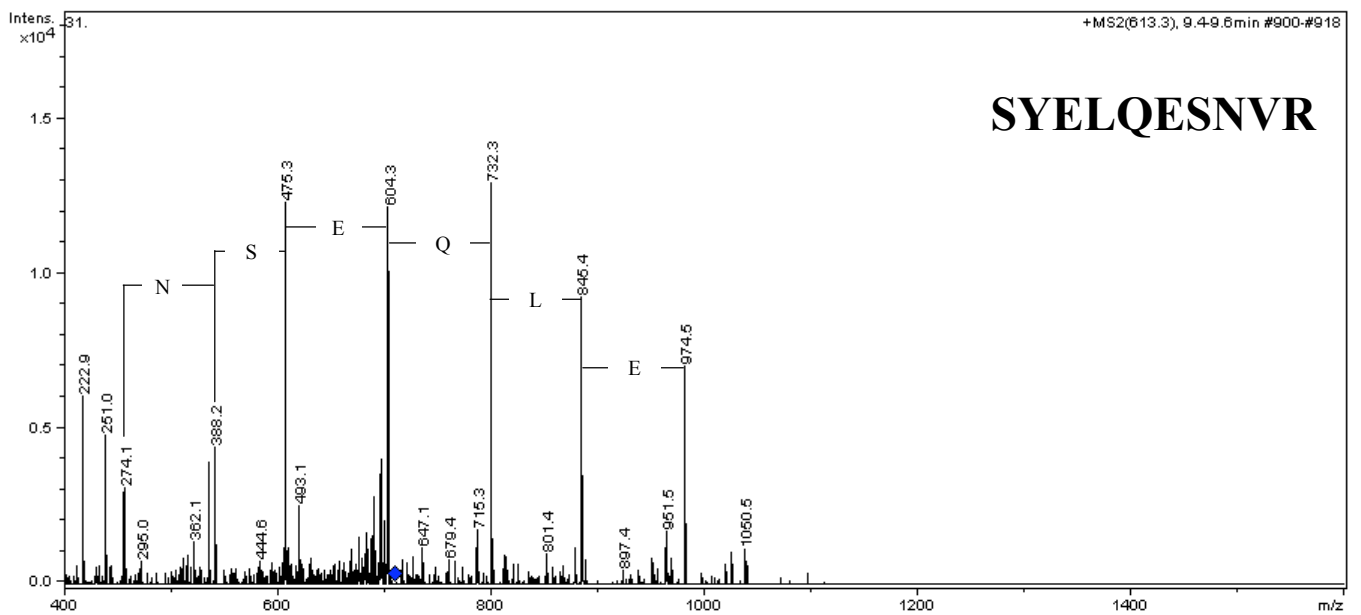

Supplement: jnc0129-1002-SD1.pdf [file jnc0129-1002-SD1.pdf]
